# Supplementary material
Source: Research Square preprint supplement (doi:10.21203/rs.3.rs-9122510/v1)
Supplement: Supplementary file 1 [file 44154f22e9799f82b68b8ec6.pdf]

## Supplementary material

**Table S1.** Aggregation of focused codes by stakeholder group

| Stakeholder group                          | Most frequent focused codes                                                                                 | Interpreted pattern                                                      |
|--------------------------------------------|-------------------------------------------------------------------------------------------------------------|--------------------------------------------------------------------------|
| Planners/managers, n = 6                   | implementation feasibility, management clarity, formal coherence, regulatory consistency, investment return | Stronger reliance on expert oriented evidence                            |
| Residents/community representatives, n = 9 | living continuity, community presence, hygiene threshold, local atmosphere, cultural interaction            | Stronger reliance on experience oriented evidence grounded in daily life |
| Visitors, n = 8                            | ecological integrity, commercial overexposure, local atmosphere, cultural interaction, hygiene threshold    | Stronger reliance on perceptual and experiential evidence                |

**Table S2.** From raw statements to focused codes

| Case site               | Participant group             | Raw statement                                                                                                                                                               | Initial code                         | Focused code                       | Higher-order domain          |
|-------------------------|-------------------------------|-----------------------------------------------------------------------------------------------------------------------------------------------------------------------------|--------------------------------------|------------------------------------|------------------------------|
| A. Hongcun              | Residents/community operators | “What matters most here is whether local people can still be seen living their normal lives. If everything turns into a photo backdrop, it no longer feels like a village.” | everyday life still visible          | living continuity                  | Experience-oriented evidence |
| A. Hongcun              | Residents/community operators | “Visitors do not just look at the houses. They also notice whether people still live here and whether the place still has a lived-in atmosphere.”                           | local life presence                  | community presence                 | Experience-oriented evidence |
| A. Hongcun              | Visitors                      | “Hongcun feels authentic to me because it does not look like a completely staged tourist site. You can still feel that people are actually living here.”                    | not staged, still lived in           | living continuity                  | Experience-oriented evidence |
| A. Hongcun              | Planners/managers             | “The renovation of a traditional village must first ensure an overall unity of appearance. It cannot be too messy.”                                                         | overall village unity                | formal coherence                   | Expert-oriented evidence     |
| A. Hongcun              | Planners/managers             | “Many renewal projects still have to consider input and output, otherwise they are difficult to sustain.”                                                                   | cost-return consideration            | implementation feasibility         | Expert-oriented evidence     |
| B. Pingyao Ancient City | Visitors                      | “As soon as you enter Pingyao Ancient City, there are too many signboards and snack shops. The sense of authenticity immediately becomes weaker.”                           | too many ads and snack shops         | commercial overexposure            | Experience-oriented evidence |
| B. Pingyao Ancient City | Visitors                      | “It still has a historical feel, but some streets now look more like commercial streets than real life in an ancient city.”                                                 | historical feel weakened by commerce | historical layering under pressure | Experience-oriented evidence |
| B. Pingyao Ancient City | Residents/community operators | “The neighborhood life that used to be here has faded. Now there is more of an order designed for tourists.”                                                                | loss of street life                  | street vitality                    | Experience-oriented evidence |
| B. Pingyao Ancient City | Residents/community operators | “If hygiene is poor, visitors will not even feel like stopping to experience the culture.”                                                                                  | poor hygiene reduces engagement      | hygiene threshold                  | Contextual condition         |

| Case site               | Participant group             | Raw statement                                                                                                                                                              | Initial code                          | Focused code               | Higher-order domain          |
|-------------------------|-------------------------------|----------------------------------------------------------------------------------------------------------------------------------------------------------------------------|---------------------------------------|----------------------------|------------------------------|
| B. Pingyao Ancient City | Planners/managers             | “Visibility, consumption level, and investment return are all things that must be considered when doing a project.”                                                        | fame, spending power, return          | economic orientation       | Expert-oriented evidence     |
| B. Pingyao Ancient City | Planners/managers             | “Renewal in an ancient city cannot be too arbitrary. At the very least, the street interface and overall appearance must maintain regulation and order.”                   | interface control and order           | management clarity         | Expert-oriented evidence     |
| B. Pingyao Ancient City | Planners/managers             | “Cultural communication is certainly important, but there must first be an operational logic that can actually be implemented.”                                            | culture secondary to operation        | implementation feasibility | Expert-oriented evidence     |
| C. Mount Huangshan      | Visitors                      | “A place like Mount Huangshan feels more authentic because it has a very strong natural character.”                                                                        | strong natural character              | ecological integrity       | Experience-oriented evidence |
| C. Mount Huangshan      | Visitors                      | “When artificial facilities are too visible, they ruin the feeling of being in the mountains.”                                                                             | visible facilities disturb atmosphere | infrastructure visibility  | Experience-oriented evidence |
| C. Mount Huangshan      | Visitors                      | “What matters most in a natural heritage site is that the environmental atmosphere remains coherent, without too many artificial traces.”                                  | consistent environmental feeling      | atmospheric consistency    | Experience-oriented evidence |
| C. Mount Huangshan      | Residents/community operators | “If visitors feel that the environment is not clean, they will not be in the mood to further experience the cultural content.”                                             | hygiene affects cultural willingness  | hygiene threshold          | Contextual condition         |
| C. Mount Huangshan      | Planners/managers             | “In a scenic site like Mount Huangshan, clear management, well-defined routes, and facility safety are basic prerequisites.”                                               | clarity and control in management     | management clarity         | Expert-oriented evidence     |
| C. Mount Huangshan      | Planners/managers             | “Protection and service need to be balanced, but service facilities must not affect the overall control of the landscape.”                                                 | balance service and landscape control | regulatory consistency     | Expert-oriented evidence     |
| Cross-site              | Visitors                      | “If a place is too commercialized, people begin to doubt whether it still retains its original character.”                                                                 | over-commercialized means less real   | commercial overexposure    | Experience-oriented evidence |
| Cross-site              | Residents/community operators | “When interactive experiences are done well, such as handicrafts, light shows, or participatory activities, it becomes easier to feel that this place really has culture.” | culture through participation         | cultural interaction       | Experience-oriented evidence |
| Cross-site              | Visitors                      | “Just looking is not enough. When a project allows me to participate, I am more likely to feel that this place has its own culture.”                                       | engagement enhances locality          | cultural interaction       | Experience-oriented evidence |
| Cross-site              | Planners/managers             | “In the end, a project still has to be judged by return and subsequent operation. It is impossible to talk only about cultural ideals.”                                    | return and operation priority         | economic orientation       | Expert-oriented evidence     |

**Table S3.** Cross-case and cross-group distribution of focused codes

| Focused code               | A. Hongcun | B. Pingyao Ancient City | C. Mount Huangshan | Planners/managers | Residents/community operators | Visitors | Interpretation                                                                             |
|----------------------------|------------|-------------------------|--------------------|-------------------|-------------------------------|----------|--------------------------------------------------------------------------------------------|
| Living continuity          | High       | Medium                  | Low                | Rare              | High                          | Medium   | Most salient in rural heritage, especially among residents and visitors                    |
| Community presence         | High       | Medium                  | Low                | Rare              | High                          | Low      | Strongly tied to locality judgments in living village settings                             |
| Historical layering        | Low        | High                    | Rare               | Low               | Medium                        | Medium   | Especially important in the urban heritage context                                         |
| Street vitality            | Low        | High                    | Rare               | Rare              | High                          | Medium   | Urban authenticity is linked to active street life rather than orderly preservation alone  |
| Spatial readability        | Low        | High                    | Low                | Medium            | Medium                        | Medium   | More frequently invoked in the urban site                                                  |
| Ecological integrity       | Rare       | Low                     | High               | Low               | Medium                        | High     | Natural heritage is strongly associated with perceived authenticity                        |
| Infrastructure visibility  | Rare       | Low                     | High               | Medium            | Low                           | High     | Most salient in the natural heritage site                                                  |
| Atmospheric consistency    | Medium     | Medium                  | High               | Low               | Medium                        | High     | Strongly related to experiential judgments, especially in natural settings                 |
| Commercial overexposure    | Low        | High                    | Low                | Rare              | Medium                        | High     | Over-commercialization was repeatedly linked to reduced authenticity, especially in Site B |
| Cultural interaction       | Medium     | Medium                  | Medium             | Rare              | High                          | High     | Residents and visitors preferred participatory cultural experiences                        |
| Hygiene threshold          | Medium     | High                    | Medium             | Rare              | High                          | High     | Hygiene emerged as a cross-cutting threshold for willingness to engage with culture        |
| Formal coherence           | Medium     | Medium                  | Medium             | High              | Low                           | Rare     | More strongly emphasized by planners and managers                                          |
| Management clarity         | Medium     | Medium                  | High               | High              | Low                           | Rare     | Closely related to expert-oriented judgments                                               |
| Regulatory consistency     | Medium     | Medium                  | High               | High              | Rare                          | Rare     | Predominantly invoked by planners/managers                                                 |
| Implementation feasibility | Medium     | Medium                  | Medium             | High              | Rare                          | Rare     | Stronger among planners/managers than among other groups                                   |
| Economic orientation       | Low        | Medium                  | Medium             | High              | Rare                          | Rare     | Planners/managers frequently referred to investment, fame, consumption level, and returns  |

**Note:** High indicates that the focused code appeared frequently and consistently in the interview materials for the corresponding case site or participant group. Medium indicates a recurring but less dominant presence. Low indicates occasional mention. Rare indicates that the code appeared only sporadically or in isolated cases. These labels are used to summarize qualitative prominence rather than precise frequency counts.

**Table S4.** Full questionnaire item pool and construct mapping

| Block   | Construct                       | Dimension                  | Item code | Item statement                                                                                    |
|---------|---------------------------------|----------------------------|-----------|---------------------------------------------------------------------------------------------------|
| Block 1 | Expert-oriented evidence        | Formal coherence           | EOE1      | The overall appearance of this site is coherent and visually well organized.                      |
| Block 1 | Expert-oriented evidence        | Formal coherence           | EOE2      | The built and environmental elements of this site are presented in a consistent way.              |
| Block 1 | Expert-oriented evidence        | Management clarity         | EOE3      | The current presentation and management of this site appear clear and orderly.                    |
| Block 1 | Expert-oriented evidence        | Regulatory consistency     | EOE4      | The current intervention seems to follow a stable and appropriate conservation logic.             |
| Block 1 | Expert-oriented evidence        | Implementation feasibility | EOE5      | The current planning and display approach appears feasible in long term operation and management. |
| Block 2 | Experience-oriented evidence    | Living continuity          | EXE1      | This site still retains visible traces of everyday local life.                                    |
| Block 2 | Experience-oriented evidence    | Community presence         | EXE2      | I can still sense the presence of a real local community here.                                    |
| Block 2 | Experience-oriented evidence    | Cultural perceptibility    | EXE3      | The local culture of this place can be clearly perceived from the site environment.               |
| Block 2 | Experience-oriented evidence    | Atmospheric consistency    | EXE4      | The atmosphere of this site feels consistent with its heritage character.                         |
| Block 2 | Experience-oriented evidence    | Cultural interaction       | EXE5      | This site provides experiences that help people engage with its local culture.                    |
| Block 3 | Perceived authenticity/locality | Authenticity               | PAL1      | This place feels authentic rather than staged.                                                    |
| Block 3 | Perceived authenticity/locality | Locality                   | PAL2      | This place still feels like itself rather than a generic tourist setting.                         |
| Block 3 | Perceived authenticity/locality | Distinctiveness            | PAL3      | This site retains distinctive local characteristics.                                              |
| Block 4 | Planning legitimacy/acceptance  | Reasonableness             | PLA1      | The current planning and presentation approach of this site is reasonable.                        |
| Block 4 | Planning legitimacy/acceptance  | Appropriateness            | PLA2      | The current form of intervention is appropriate for this site.                                    |
| Block 4 | Planning legitimacy/acceptance  | Acceptability              | PLA3      | I can accept the current way this site is planned and presented.                                  |
| Block 5 | Support intention               | Protection support         | SUP1      | I would be willing to support the protection and future development of this site.                 |
| Block 5 | Support intention               | Recommendation intention   | SUP2      | I would be willing to recommend this site to others.                                              |
| Block 5 | Support intention               | Continued engagement       | SUP3      | I would be willing to revisit, follow, or continue paying attention to this site.                 |

*Note: This item pool represents the draft questionnaire structure developed from the qualitative phase. Final item retention was subject to pilot testing, wording refinement, and construct validation.*

**Table S5.** Vignette attributes and site-specific scenario structure

| Site type / case code   | Scenario attribute        | Low-condition description                                                                   | High-condition description                                                                           | Role in vignette design                                                                     |
|-------------------------|---------------------------|---------------------------------------------------------------------------------------------|------------------------------------------------------------------------------------------------------|---------------------------------------------------------------------------------------------|
| A. Hongcun              | Living continuity         | Few visible signs of daily local life; the site appears mainly arranged for tourists        | Visible household activity, everyday use, and signs of ordinary village life remain present          | Tests whether judgments of authenticity/locality increase when living continuity is visible |
|                         | Community presence        | Local residents appear absent or marginal in the site environment                           | Local residents and community-based activities remain perceptible in the site environment            | Tests the role of community presence in rural heritage judgments                            |
|                         | Cultural interaction      | Cultural content is mainly displayed passively through viewing                              | Visitors can engage through craft making, guided interaction, or place-based interpretive activities | Tests whether participatory experience strengthens locality perception                      |
| B. Pingyao Ancient City | Historical layering       | Historical traces appear flattened or visually simplified                                   | Multiple historical traces remain readable in streets, buildings, and spatial detail                 | Tests the role of historical layering in urban heritage judgments                           |
|                         | Street vitality           | Streets appear orderly but socially thin, with limited everyday activity                    | Streets retain visible everyday activity, mixed uses, and lived urban rhythm                         | Tests whether vitality contributes to authenticity beyond visual order                      |
|                         | Spatial readability       | Street structure and site logic are difficult to interpret as a historic urban environment  | Spatial organization remains legible and supports understanding of the historic setting              | Tests the role of spatial readability in urban heritage understanding                       |
|                         | Commercial overexposure   | Commercial signage, snack shops, and tourist-oriented business are highly visible and dense | Commercial elements are controlled and do not dominate the heritage scene                            | Tests whether over-commercialization reduces authenticity/locality judgments                |
| C. Mount Huangshan      | Ecological integrity      | Strong traces of human intervention reduce the sense of natural continuity                  | Natural features remain dominant and the environment feels minimally disturbed                       | Tests the role of ecological integrity in natural heritage judgments                        |
|                         | Infrastructure visibility | Service facilities, routes, and artificial elements are highly visible                      | Facilities are present but visually unobtrusive within the landscape                                 | Tests whether visible intervention weakens perceived authenticity                           |
|                         | Atmospheric consistency   | The environmental atmosphere feels fragmented or overly artificial                          | The atmosphere feels coherent with the site's natural heritage character                             | Tests the role of atmospheric consistency in natural site perception                        |
| Cross-cutting           | Hygiene threshold         | The environment appears dirty, disordered, or poorly maintained                             | The environment appears clean, orderly, and comfortable for continued engagement                     | Tests whether hygiene functions as a threshold condition for cultural willingness           |
|                         | Cultural interaction      | Visitors mainly observe with limited engagement opportunities                               | Visitors can participate in interpretive, interactive, or culturally guided activities               | Tests whether interaction strengthens cultural understanding across site types              |

**Table S6.** Distribution of valid questionnaires by case site and participant group

| Case site               | Distributed questionnaires | Valid questionnaires | Valid rate   | Planners/managers | Residents/community operators | Visitors   |
|-------------------------|----------------------------|----------------------|--------------|-------------------|-------------------------------|------------|
| A. Hongcun              | 620                        | 273                  | 44.0%        | 27                | 66                            | 180        |
| B. Pingyao Ancient City | 760                        | 308                  | 40.5%        | 32                | 76                            | 200        |
| C. Mount Huangshan      | 584                        | 212                  | 36.3%        | 24                | 48                            | 140        |
| <b>Total</b>            | <b>1964</b>                | <b>793</b>           | <b>40.4%</b> | <b>83</b>         | <b>190</b>                    | <b>520</b> |

**Table S7.** Reliability and measurement adequacy results

| Section              | Construct / Index               | Number of items | Value          |
|----------------------|---------------------------------|-----------------|----------------|
| Reliability          | Expert-oriented evidence        | 4               | $\alpha=0.883$ |
|                      | Experience-oriented evidence    | 5               | $\alpha=0.898$ |
|                      | Perceived authenticity/locality | 3               | $\alpha=0.860$ |
|                      | Planning legitimacy/acceptance  | 3               | $\alpha=0.798$ |
|                      | Support intention               | 3               | $\alpha=0.820$ |
|                      | Overall scale                   | 18              | $\alpha=0.803$ |
| Measurement adequacy | KMO                             | —               | 0.933          |
|                      | Bartlett's $\chi^2$             | —               | 8297.656       |
|                      | Bartlett's df                   | —               | 153            |
|                      | Bartlett's p                    | —               | < 0.001        |
|                      | CFA $\chi^2$                    | —               | 247.318        |
|                      | CFA df                          | —               | 125            |
|                      | $\chi^2/df$                     | —               | 1.979          |
|                      | CFI                             | —               | 0.972          |
|                      | TLI                             | —               | 0.966          |
|                      | RMSEA                           | —               | 0.035          |
